# Supplementary material for: Defluoridation using hydroxyapatite implanted lanthanum organic framework-based bio-hybrid beads
Source: Royal Society of Chemistry journal article supplement (doi:10.1039/d2re00161f), 2022-01-01
Supplement: d2re00161f1.pdf [file d2re00161f1.pdf]

## **Supplementary material**

### **Defluoridation using hydroxyapatite implanted lanthanum organic**

#### **frameworks based bio-hybrid beads**

Antonysamy Jeyaseelan<sup>a</sup>, Ilango Aswin Kumar<sup>b</sup>, Mu. Naushad<sup>c</sup>, Natrayasamy Viswanathan<sup>a\*</sup>

<sup>a</sup>Department of Chemistry, Anna University, University College of Engineering - Dindigul,  
Reddiyarchatram, Dindigul - 624 622, Tamilnadu, India.

<sup>b</sup>Faculty of Civil Engineering, Department of Landscape and Water Conservation,  
Czech Technical University in Prague, Thakurova 7, 166 29, Prague 6, Czech Republic.

<sup>c</sup>Department of Chemistry, College of Science, King Saud University, P.O. Box 2455, Riyadh-  
11451, Saudi Arabia.

\* Corresponding author. Tel.: +91-451-2554066; fax: +91-451-2554066.

E-mail address: drnviswanathan@gmail.com (N.Viswanathan)

25

26

27

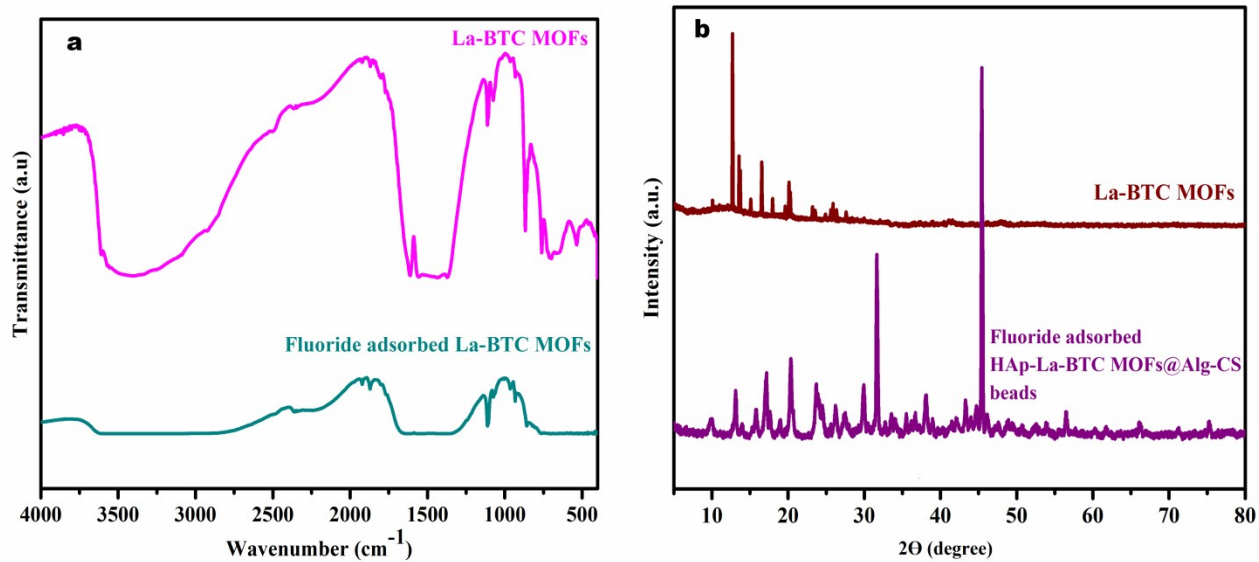

28

29 **Fig. S1.** FTIR spectra of (a) La-BTC MOFs and fluoride La-BTC MOFs; (b) XRD spectra of La-  
30 BTC MOFs and fluoride adsorbed HAp-La-BTC MOFs@Alg-CS beads.

31

32

33

34

35

36

37

38

39

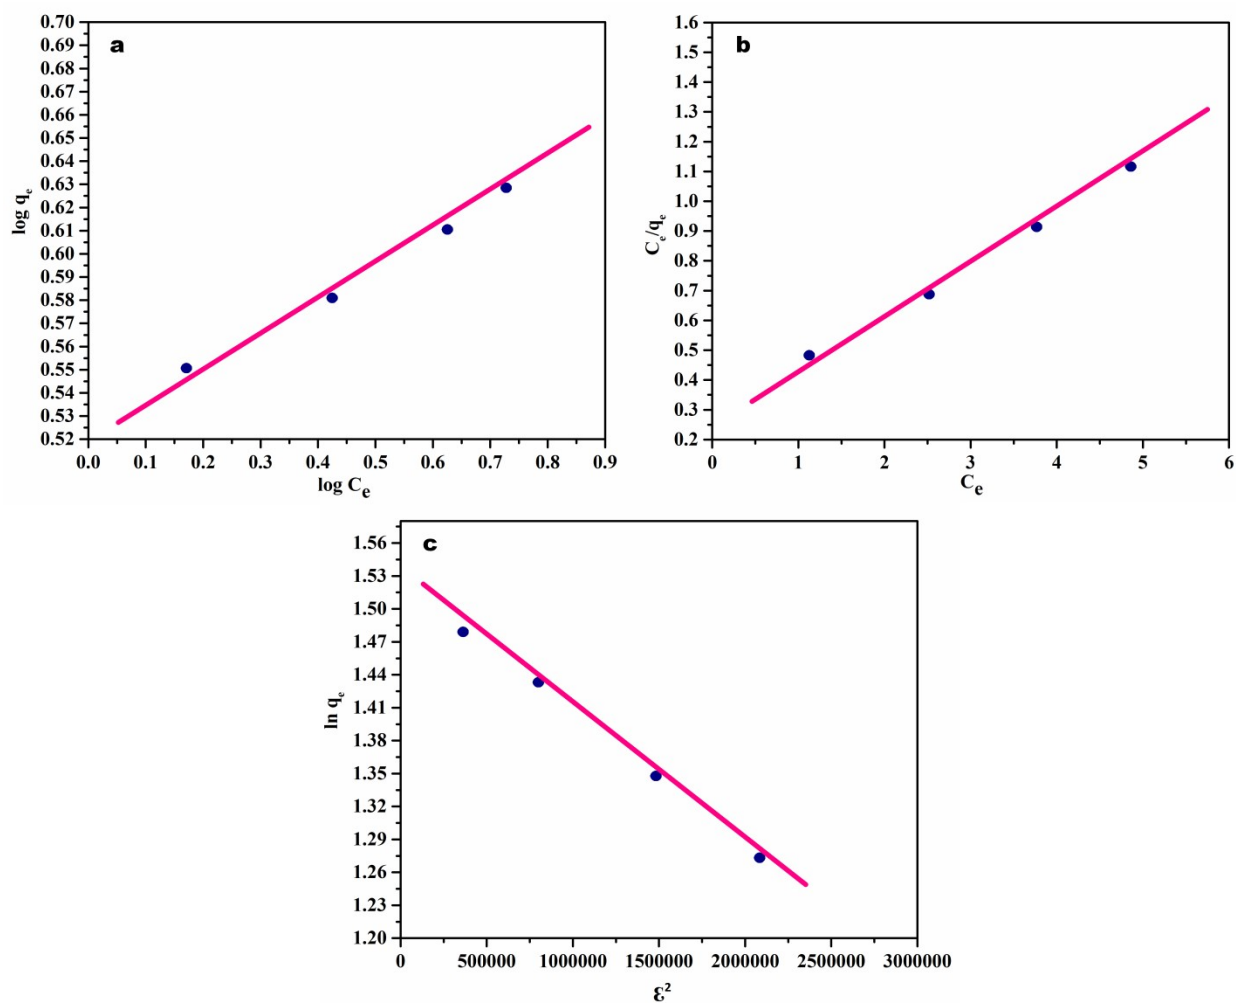

40

41

42 **Fig. S2.** The linear plots of (a) Freundlich; (b) Langmuir and (c) Dubinin-Raduskevich;

43 adsorption isotherm models of HAp-La-BTC MOFs@Alg-CS beads for fluoride adsorption at

44 303K.

45

46

47

48

49

50

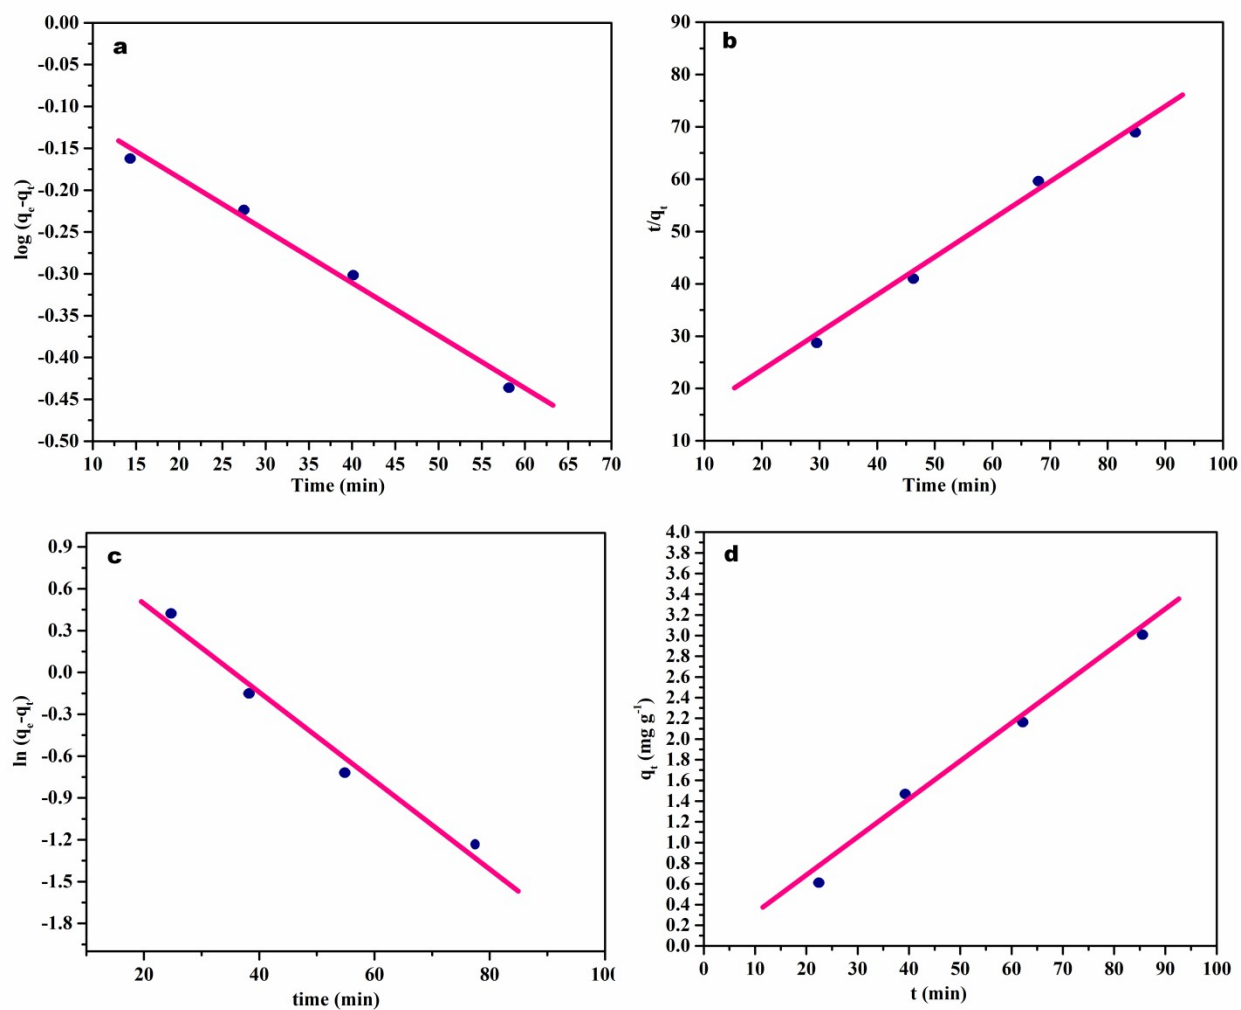

52

53 **Fig. S3.** Kinetic studies of (a) pseudo-first-order; (b) pseudo-second-order kinetic models; (c)  
 54 particle diffusion and (d) intra particle diffusion model of HAp-La-BTC MOFs@Alg-CS beads  
 55 for fluoride adsorption at 303K.

56

57

58

**Table S1.** Kinetic studies of HAp-La-BTC MOFs@Alg-CS beads for fluoride adsorption.

| Kinetic models           | Parameters                    | 303 K  |         |         |         | 313 K  |         |         |         | 323 K  |         |         |         |
|--------------------------|-------------------------------|--------|---------|---------|---------|--------|---------|---------|---------|--------|---------|---------|---------|
|                          |                               | 8 mg/L | 10 mg/L | 12 mg/L | 14 mg/L | 8 mg/L | 10 mg/L | 12 mg/L | 14 mg/L | 8 mg/L | 10 mg/L | 12 mg/L | 14 mg/L |
| Pseudo-first-order       | $k_{ad} (\text{min}^{-1})$    | 0.082  | 0.086   | 0.091   | 0.095   | 0.085  | 0.088   | 0.093   | 0.099   | 0.087  | 0.091   | 0.096   | 0.102   |
|                          | r                             | 0.837  | 0.842   | 0.849   | 0.855   | 0.840  | 0.845   | 0.853   | 0.861   | 0.843  | 0.849   | 0.857   | 0.866   |
|                          | sd                            | 0.396  | 0.403   | 0.410   | 0.416   | 0.401  | 0.407   | 0.413   | 0.422   | 0.404  | 0.411   | 0.418   | 0.428   |
| Pseudo-second-order      | $q_e (\text{mg/g})$           | 4.625  | 4.632   | 4.639   | 4.644   | 4.629  | 4.636   | 4.642   | 4.651   | 4.633  | 4.639   | 4.642   | 4.648   |
|                          | $k (\text{g/mg min}^{-1})$    | 0.288  | 0.293   | 0.297   | 0.302   | 0.291  | 0.296   | 0.301   | 0.307   | 0.295  | 0.299   | 0.305   | 0.312   |
|                          | $h (\text{mg/g min}^{-1})$    | 4.124  | 4.131   | 4.138   | 4.143   | 4.128  | 4.134   | 4.141   | 4.147   | 4.132  | 4.138   | 4.145   | 4.152   |
|                          | r                             | 0.911  | 0.917   | 0.924   | 0.931   | 0.914  | 0.921   | 0.928   | 0.934   | 0.919  | 0.924   | 0.931   | 0.939   |
|                          | sd                            | 0.146  | 0.154   | 0.162   | 0.170   | 0.152  | 0.161   | 0.169   | 0.174   | 0.157  | 0.164   | 0.172   | 0.178   |
| Particle diffusion       | $k_p (\text{min}^{-1})$       | 0.592  | 0.598   | 0.604   | 0.613   | 0.595  | 0.601   | 0.609   | 0.618   | 0.599  | 0.604   | 0.613   | 0.622   |
|                          | r                             | 0.845  | 0.852   | 0.858   | 0.864   | 0.851  | 0.857   | 0.862   | 0.871   | 0.855  | 0.861   | 0.868   | 0.876   |
|                          | sd                            | 0.348  | 0.356   | 0.363   | 0.371   | 0.353  | 0.361   | 0.369   | 0.377   | 0.358  | 0.364   | 0.372   | 0.483   |
| Intra particle diffusion | $k_i (\text{mg/g min}^{0.5})$ | 1.182  | 1.188   | 1.193   | 1.199   | 1.185  | 1.191   | 1.196   | 1.202   | 1.189  | 1.195   | 1.201   | 1.208   |
|                          | r                             | 0.932  | 0.938   | 0.946   | 0.955   | 0.937  | 0.942   | 0.951   | 0.959   | 0.941  | 0.946   | 0.954   | 0.962   |
|                          | sd                            | 0.122  | 0.128   | 0.134   | 0.139   | 0.125  | 0.131   | 0.137   | 0.142   | 0.129  | 0.133   | 0.141   | 0.148   |
